# Supplementary material for: Phylogenetic Characterization of HIV-1 Sub-Subtype A1 in Karachi, Pakistan
Source: MDPI journal article supplement (doi:10.3390/v14102307), 2022-10-20

## **SUPPLEMENTARY DATA**

### **Table S1.**

List of accession number of HIV-1 Gag sequences from Pakistan used in this study.

### **Table S2.**

Profile of the people living with HIV-1 (PLHV-1) in Pakistan recruited for this study. The participants belong to the following high-risk communities: people who inject drugs (PWID) (N=43), men who have sex with men (MSM) (N=10), heterosexual (HET) (N=3), and spouses of Infected men (SP) (N=05). Few participants with no information for high-risk behavior as marked as not available (NA).

### **Table S3.**

The list of accession numbers of all Kenyan HIV-1 subtype A1 sequences from the database was used to construct the Kenyan HIV-1 subtype A1 tree.

### **Table S4.**

The list of net charges and total charges. A) The list of accessions of Pakistani Subtype A1 gag protein sequences with their respective net charge (NC) and total charge (TC). B) The list of accession numbers of Kenyan Subtype A1 strain sequences with their respective net charge (NC) and total charge (TC).

**Table S5.**

List of anchoring residues in HIV-1 subtype A1 gag protein from Kenya and Pakistan. Columns 1-4 represent the predicted epitope, the position in reference to the HXB2, restricting HLA types, and restricted HLA amino acid anchors in HIV-1 subtype A. A1) The list of anchoring residues in HIV-1 subtype A1 gag protein at position 303 HXB2 in Pakistan. A2) The list of anchoring residues in HIV-1 subtype A1 gag protein at position 303 HXB2 in Kenya. B1) The list of anchoring residues in HIV-1 subtype A1 gag protein at position 332 HXB2 in Pakistan. B2) The list of anchoring residues in HIV-1 subtype A1 gag protein at position 332 HXB2 in Kenya. C1) The list of anchoring residues in HIV-1 subtype A1 gag protein at position 357 HXB2 in Pakistan. C2) The list of anchoring residues in HIV-1 subtype A1 gag protein at position 357 HXB2 in Kenya. D1) The list of anchoring residues in HIV-1 subtype A1 gag protein at positions 370, 372 and 375 HXB2 in Pakistan. D2) The list of anchoring residues in HIV-1 subtype A1 gag protein at positions 370, 372 and 375 HXB2 in Kenya. E1) The list of anchoring residues in HIV-1 subtype A1 gag protein at position 383 HXB2 in Pakistan. E2) The list of anchoring residues in HIV-1 subtype A1 gag protein at position 383 HXB2 in Kenya. The unique epitopes identified in Kenyan and Pakistani HIV-1 subtype A1 sequences are highlighted in grey. The unique restricting HLA types and HLA anchoring amino acids between Kenyan and Pakistani HIV-1 subtype A1 are represented in blue font.

**Table S6.** The list of accession numbers along with biophysical properties difference of the sequences different between Kenyan and Pakistani HIV-1 subtype A1. The colors blue and grey represents unique positions, 312, 319, 331, 372, 273, 383, and 402, in Pakistani and Kenyan sequences. The amino acid difference in each position for Pakistani and Kenyan sequences is given

in column 3, whereas the number of amino acids for each position is given in column 4. The amino acids are represented as arginine (R), lysine (K), glutamic acid (E), aspartic acid (D), and histidine (H). The potential N-linked glycosylation sites (PNGs) were only found in Kenyan HIV-1 subtype A1 sequences.

**Figure S1.** Genotyping of HIV-1 subtype A1. HIV-1 subtype A1 sequences from Pakistan and subtype A1 reference sequences from Los Alamos Database (<https://www.hiv.lanl.gov/>) are represented with blue and purple branches, respectively.

**Figure S2.** Clustering pattern of Kenyan reference dataset sequence with all available Kenyan sequences from the Los Alamos HIV Database. The Blue highlighted area in the maximum likelihood tree represents the clusters of database sequences containing Kenyan reference dataset sequences.

**Figure S3.** Amino acid variations within Pakistani and Kenyan cohorts. Acidic, Basic, Polar, and Hydrophobic amino acids are represented in Red, Blue, Green, and purple colors. The dominant amino acids are shown as web logos for A) Kenyan Reference Data set and B) the Pakistani dataset.

**Figure S4.** Sites under selection pressure in Pakistani and Kenyan reference subtype A1. A) Mean dN/dS ratio of HIV-1 subtype A1 from Pakistan. B) Mean dN/dS ratio of HIV-1 subtype A1 from Kenyan reference dataset. X-axis and Y-axis represented the HXB2 position of HIV-1 Gag protein and mean dN/dS ratio, respectively. The red dotted line defines the threshold for positive selection pressure.

**Table S1. List of accession number of HIV-1 Gag sequences from Pakistan used in this study.**

| <b>Accession numbers for the Pakistani HIV-1 gag sequences used in the study</b>   |                                                                                                                                                                                                                                                                                                                                            |
|------------------------------------------------------------------------------------|--------------------------------------------------------------------------------------------------------------------------------------------------------------------------------------------------------------------------------------------------------------------------------------------------------------------------------------------|
| <b>Sequences from the PLHIV part of our study cohort</b>                           | KY435514-KY435538, KY435540-KY435548, KY435564-KY435566, MH819260, MH819262-MH819276, MH819261 and MH819277-MH819283                                                                                                                                                                                                                       |
| <b>Sequences deposited previously to the Los Alamos HIV Database from Pakistan</b> | GU376767, GU376770, GU376772-GU376774, GU376776-GU376779, GU376781, GU376783-GU376785, GU376788-GU376792, JF804693-JF804721, JF804723-JF804726, JF804728-JF804737, JF804739-JF804741, JF804743-JF804744, KX232594-KX232595, KX232597, KX232600, KX232606, KX232607, KX232609-KX232611, KX232614, KX232618-KX232621, KX232624 and KX232626. |

**Table S2. Patient profile of the recruited people living with HIV-1 (PLHV-1) in Pakistan.**

| <b>High-Risk Behaviors</b> | <b>PWID</b>                                    | <b>MSM</b>                                      | <b>HET</b> | <b>SP</b> |
|----------------------------|------------------------------------------------|-------------------------------------------------|------------|-----------|
| No. of Patients            | N=42                                           | N=10<br>N=02                                    | N=03       | N=05      |
| <b>CD4 cell count</b>      | <b>Low CD4 cells count (&lt;350 cells/mm3)</b> | <b>High CD4 cells count (&gt;350 cells/mm3)</b> |            |           |
| No. of Patients            | N=10                                           | N=51                                            |            |           |
| <b>Viral Load (IU/ml)</b>  | <b>Detectable Viral Load (&gt; 400 IU/ml)</b>  | <b>Undetectable Viral Load</b>                  |            |           |
| No. of Patients            | N=30                                           | N=13                                            |            |           |

**Table S3. The list of accession numbers of all Kenyan HIV-1 subtype A1 sequences from the database used to construct the Kenyan HIV-1 subtype A1 phylogenetic tree.**

| Accession numbers of all available Kenyan subtype A1 sequences in the Los Alamos Sequence Database                                                                                                                                                                                                                                                                                                                                                                                                                                                                                                                                                                                                                                                                                                                                                                                                                                                                                                                                                                                                                                                                                                                                                                                                                                                                                                                                                                                                                                                                                                                                                                                                                               |
|----------------------------------------------------------------------------------------------------------------------------------------------------------------------------------------------------------------------------------------------------------------------------------------------------------------------------------------------------------------------------------------------------------------------------------------------------------------------------------------------------------------------------------------------------------------------------------------------------------------------------------------------------------------------------------------------------------------------------------------------------------------------------------------------------------------------------------------------------------------------------------------------------------------------------------------------------------------------------------------------------------------------------------------------------------------------------------------------------------------------------------------------------------------------------------------------------------------------------------------------------------------------------------------------------------------------------------------------------------------------------------------------------------------------------------------------------------------------------------------------------------------------------------------------------------------------------------------------------------------------------------------------------------------------------------------------------------------------------------|
| AF004885, AF184374, AF184418-AF184424, AF184426-AF184432, AF184434, AF184436-AF184439, AF184441, AF184443-AF184452, AF184454-AF184457, AF184459-AF184461, AF184463, AF457052-AF457053, AF457055, AF457063, AF457065-AF457070, AF457079-AF457081, AF457083-AF457084, AF457086, AY322184-AY322185, AY322190, AY322193, AY492753, AY492761, AY492765, AY492777, AY492780, AY772953-AY772955, AY772958, AY772968-AY772971, AY772985, DQ367262-DQ367266, DQ367268-DQ367269, DQ367271-DQ367275, DQ367277-DQ367278, DQ367280-DQ367284, DQ367286-DQ367288, DQ36729-DQ367296, EU110085, EU110087-EU110088, EU110092, EU110094-EU110095, EU110097, FJ623475-FJ623486, FJ623488, GQ429817-GQ429866, GQ429868-GQ429891, GQ429893-GQ429941, GQ430033-GQ430034, GQ430036-GQ430090, GQ430176-GQ430206, GQ430208, GQ430210, GQ430213-GQ430219, GQ430222-GQ430223, GQ430225, GQ430227, GQ430230, GQ430293, GQ430295- GQ430318, GQ430320- GQ430324, GQ430355-GQ430356, GQ430358-GQ430445, GQ430448-GQ430478, GQ430480-GQ430487, GQ430489-GQ430508, GQ430510-GQ430644, GQ430674-GQ430701, GQ430703-GQ430706, GQ430708-GQ430737, GQ430768-GQ430824, GQ430826-GQ430892, GQ430929, GQ430931, GQ430933-GQ430934, GQ430941, GQ430949, GQ430951, GQ430955, GQ430988-GQ430991, GQ430993-GQ430995, GQ430997-GQ431022, GQ431024-GQ431033, GQ431220-GQ431229, GQ431232-GQ431234, GQ431236-GQ431237, GQ431241-GQ431242, GQ431244-GQ431245, GQ431248, GQ431310-GQ431325, GQ431357-GQ431359, GQ431361-GQ431368, GQ431370-GQ431375, GQ431377-GQ431386, GQ431388, GQ431391-GQ431392, GQ431396, GQ431398, GQ431401, GQ431404, GQ431406-GQ431407, GQ431415-GQ431447, GQ431661-GQ431692, GQ431724-GQ431749, GQ431783, GQ431790, GQ431844-GQ431852, GQ431854-GQ431867, |

GQ431869-GQ431875, GQ431908-GQ431949, GQ431951-GQ431964, GQ431966, GQ431968, GQ431970, GQ431972-GQ431973, GQ431975, GQ431977-GQ431978, GQ431981, GQ431983-GQ431984, GQ431986-GQ432064, GQ432094, GQ432097-GQ432099, GQ432101-GQ432103, GQ432105-GQ432106, GQ432109-GQ432112, GQ432114, GQ432116-GQ432120, GQ432122, GQ432124, GQ432127, GQ432138, GQ432140-GQ432141, GQ432143, GQ432150-GQ432182, GQ432184-GQ432208, GQ432238, GQ432240, GQ432244, GQ432246-GQ432247, GQ432250-GQ432252, GQ432255-GQ432257, GQ432260, GQ432262, GQ432264, GQ432294-GQ432306, GQ432308-GQ432336, GQ432338-GQ432389, GQ432391-GQ432412, GQ432414-GQ432415, GQ432417-GQ432419, GQ432422-GQ432424, GQ432426, GQ432428-GQ432436, GQ432438-GQ432441, GQ432443, GQ432445-GQ432479, GQ432481-GQ432491, GQ432493-GQ432529, GQ432562-GQ432593, GQ432595-GQ432625, GQ432627-GQ432633, GQ432636-GQ432638, GQ432640-GQ432646, GQ432648-GQ432653, GQ432655-GQ432664, GQ432666-GQ432668, GQ432670-GQ432693, GQ432696-GQ432698, GQ432701-GQ432747, GQ432749-GQ432758, GQ432760-GQ432764, GQ432766, GQ432768, GQ432772, GU245696, GU245698-GU245702, GU245705-GU245710, GU245712-GU245715, GU245721, GU245725, GU245727, GU245730, GU245732, GU245734, GU245736-GU245737, GU245741-GU245743, GU245745-GU245746, GU245748-GU245750, GU245758, GU245760-GU245763, KF716474-KF716475, KR020057, KR020059, KR020061, KR020064-KR020069, KR020073, KR020075-KR020076, KR020078-KR020082, KR020085-KR020086, KR020090, KR020092, KR020096-KR020098, KR020100-KR020102, KR781619-KR781620, KR781622-KR781625, KR781627-KR781628, KR781630-KR781631, KR781641, KR781646, KT022360-KT022361, KT022363-KT022365, KT022368-KT022370, KT022372-KT022378, KT022380-KT022384, KU921861-KU921867, KU921885-KU921888, KU921893-KU921903, KU921911-KU921917, KU921926-KU921938, KU921948-KU921961, KU921975-KU921978, KU921983-KU921986, KU921991-KU921994, KU922008-KU922010, KU922017-KU922019, KU922046, KU922051-KU922055, KU922058, KU922063-KU922064, KU922069-KU922076, KU922087-KU922089, KX233975-KX233977, KX233980,

KX233989, KX233991, KX233993, KX233996-KX233998, KX234002-KX234003, KX234010-KX234011, KX234013, KX234016-KX234017, KX234021, KX234025, KX234028-KX234030, KX234033, KX234035-KX234040, KX234042, KX234044-KX234045, KX234048-KX234049, KX234052, KX234054-KX234055, KX234061, KX234066-KX234068, KX234070-KX234073, KX234076-KX234077, KX302403-KX302404, KX302408, KX302414-KX302415, KX302427-KX302428, KX302431-KX302434, KX302448-KX302449, KX302472-KX302474, KX302478, KX302489, KX302490-KX302491, KX302497-KX302498, KX302507, KX302512, KX302514-KX302515, KX302526, KX302529-KX302532, KX302545-KX302547, KX302551-KX302554, KX302569-KX302571, KX302580-KX302581, KX302584, KX302592-KX302593, KY351787-KY351798, L11773-L11775.



**Table S4. The list of Net charges and total charge**

| <b>A</b>  |                 |           |           |           |                 |           |           |           |                 |           |           |
|-----------|-----------------|-----------|-----------|-----------|-----------------|-----------|-----------|-----------|-----------------|-----------|-----------|
| <b>S#</b> | <b>Sequence</b> | <b>NC</b> | <b>TC</b> | <b>S#</b> | <b>Sequence</b> | <b>NC</b> | <b>TC</b> | <b>S#</b> | <b>Sequence</b> | <b>NC</b> | <b>TC</b> |
| 1         | KY435514        | 13        | 37        | 42        | MH819283        | 13        | 37        | 83        | JF804710        | 13        | 37        |
| 2         | KY435516        | 13        | 37        | 43        | KY435533        | 13        | 37        | 84        | JF804707        | 13        | 37        |
| 3         | MH819262        | 13        | 37        | 44        | KY435518        | 13        | 37        | 85        | JF804701        | 13        | 37        |
| 4         | KY435564        | 13        | 37        | 45        | KY435528        | 13        | 37        | 86        | JF804732        | 13        | 37        |
| 5         | MH819279        | 11        | 35        | 46        | KY435543        | 13        | 37        | 87        | JF804718        | 13        | 37        |
| 6         | KY435524        | 13        | 37        | 47        | JF804729        | 13        | 37        | 88        | JF804735        | 12        | 36        |
| 7         | KY435517        | 13        | 37        | 48        | JF804693        | 12        | 36        | 89        | KX232594        | 13        | 37        |
| 8         | KY435519        | 13        | 37        | 49        | JF804696        | 13        | 37        | 90        | KX232595        | 13        | 37        |
| 9         | MH819263        | 13        | 37        | 50        | JF804724        | 13        | 37        | 91        | KX232597        | 13        | 37        |
| 10        | KY435520        | 13        | 37        | 51        | JF804728        | 13        | 37        | 92        | KX232600        | 13        | 37        |
| 11        | KY435523        | 14        | 38        | 52        | JF804734        | 13        | 37        | 93        | KX232606        | 13        | 37        |
| 12        | KY435535        | 13        | 37        | 53        | JF804733        | 13        | 37        | 94        | KX232607        | 12        | 38        |
| 13        | KY435566        | 15        | 37        | 54        | JF804697        | 13        | 37        | 95        | KX232609        | 13        | 37        |
| 14        | KY435515        | 13        | 37        | 55        | JF804694        | 13        | 37        | 96        | KX232610        | 13        | 37        |
| 15        | KY435521        | 13        | 37        | 56        | JF804723        | 13        | 37        | 97        | KX232611        | 13        | 37        |
| 16        | MH819265        | 13        | 37        | 57        | JF804695        | 13        | 37        | 98        | KX232614        | 13        | 37        |
| 17        | KY435530        | 13        | 37        | 58        | JF804726        | 13        | 37        | 99        | KX232618        | 13        | 37        |
| 18        | MH819281        | 12        | 38        | 59        | JF804725        | 13        | 37        | 100       | KX232619        | 13        | 37        |
| 19        | MH819266        | 16        | 38        | 60        | JF804708        | 13        | 37        | 101       | KX232620        | 13        | 37        |
| 20        | KY435536        | 13        | 37        | 61        | JF804709        | 13        | 37        | 102       | KX232621        | 13        | 37        |
| 21        | KY435542        | 13        | 37        | 62        | JF804702        | 13        | 37        | 103       | KX232624        | 13        | 37        |
| 22        | KY435522        | 13        | 37        | 63        | JF804730        | 13        | 37        | 104       | KX232626        | 13        | 37        |
| 23        | KY435525        | 13        | 37        | 64        | JF804720        | 13        | 37        | 105       | GU376767        | 13        | 37        |
| 24        | KY435527        | 13        | 37        | 65        | JF804700        | 13        | 37        | 106       | GU376770        | 13        | 37        |
| 25        | MH819267        | 13        | 37        | 66        | JF804704        | 13        | 37        | 107       | GU376772        | 13        | 37        |
| 26        | KY435534        | 13        | 37        | 67        | JF804711        | 13        | 37        | 108       | GU376773        | 13        | 37        |
| 27        | MH819269        | 13        | 37        | 68        | JF804715        | 13        | 37        | 109       | GU376774        | 13        | 37        |
| 28        | MH819272        | 13        | 37        | 69        | JF804737        | 12        | 36        | 110       | GU376776        | 13        | 37        |
| 29        | KY435541        | 13        | 37        | 70        | JF804719        | 13        | 37        | 111       | GU376777        | 13        | 37        |
| 30        | KY435537        | 13        | 37        | 71        | JF804697        | 13        | 37        | 112       | GU376778        | 13        | 37        |
| 31        | MH819273        | 13        | 37        | 72        | JF804699        | 13        | 37        | 113       | GU376779        | 13        | 37        |
| 32        | MH819282        | 12        | 36        | 73        | JF804706        | 12        | 36        | 114       | GU376781        | 13        | 37        |
| 33        | KY435526        | 13        | 37        | 74        | JF804713        | 12        | 36        | 115       | GU376783        | 13        | 37        |
| 34        | KY435538        | 13        | 37        | 75        | JF804714        | 13        | 37        | 116       | GU376784        | 13        | 37        |
| 35        | MH819274        | 13        | 37        | 76        | JF804716        | 13        | 37        | 117       | GU376785        | 13        | 37        |
| 36        | KY435529        | 13        | 37        | 77        | JF804717        | 13        | 37        | 118       | GU376788        | 13        | 37        |
| 37        | MH819280        | 13        | 37        | 78        | JF804736        | 12        | 36        | 119       | GU376789        | 13        | 37        |
| 38        | MH819275        | 13        | 37        | 79        | JF804703        | 13        | 37        | 120       | GU376790        | 13        | 37        |
| 39        | KY435531        | 13        | 37        | 80        | JF804731        | 13        | 37        | 121       | GU376791        | 13        | 37        |
| 40        | MH819276        | 13        | 37        | 81        | JF804721        | 13        | 37        | 122       | GU376792        | 13        | 37        |
| 41        | KY435532        | 13        | 37        | 82        | JF804712        | 12        | 36        | 123       | JF804705        | 13        | 37        |

| <b>B</b>  |                 |           |           |           |                 |           |           |
|-----------|-----------------|-----------|-----------|-----------|-----------------|-----------|-----------|
| <b>S#</b> | <b>Sequence</b> | <b>NC</b> | <b>TC</b> | <b>S#</b> | <b>Sequence</b> | <b>NC</b> | <b>TC</b> |
| 1         | AF184453        | 13        | 37        | 27        | GQ429867        | 13        | 37        |
| 2         | AF184458        | 13        | 37        | 28        | KR781626        | 13        | 37        |
| 3         | AF184435        | 13        | 37        | 29        | AY492759        | 13        | 37        |
| 4         | AF184442        | 13        | 37        | 30        | GQ432183        | 13        | 37        |
| 5         | AF184462        | 13        | 37        | 31        | GQ432420        | 13        | 37        |
| 6         | AF184440        | 13        | 37        | 32        | GQ432635        | 13        | 37        |
| 7         | L11768          | 13        | 37        | 33        | GQ432759        | 13        | 37        |
| 8         | KR781621        | 13        | 37        | 34        | AY772986        | 13        | 37        |
| 9         | KX234022        | 13        | 37        | 35        | GQ432480        | 13        | 37        |
| 10        | AF539405        | 13        | 37        | 36        | DQ367289        | 13        | 37        |
| 11        | GQ432307        | 13        | 37        | 37        | DQ367290        | 13        | 37        |
| 12        | GQ432337        | 13        | 37        | 38        | KX302407        | 13        | 37        |
| 13        | GQ430209        | 12        | 36        | 39        | AF457089        | 13        | 37        |
| 14        | GQ430294        | 13        | 37        | 40        | GQ430357        | 13        | 37        |
| 15        | GQ431965        | 13        | 37        | 41        | GQ431023        | 13        | 37        |
| 16        | GQ432033        | 13        | 37        | 42        | GQ430035        | 13        | 37        |
| 17        | GQ432390        | 13        | 37        | 43        | KT022367        | 13        | 37        |
| 18        | GQ430393        | 12        | 36        | 44        | FJ623487        | 13        | 37        |
| 19        | GQ430447        | 13        | 37        | 45        | KR020077        | 12        | 36        |
| 20        | GQ430479        | 13        | 37        | 46        | KR020056        | 13        | 37        |
| 21        | GQ430564        | 13        | 37        | 47        | KR020105        | 13        | 37        |
| 22        | GQ430825        | 13        | 37        | 48        | KR020074        | 13        | 37        |
| 23        | AY492766        | 13        | 37        | 49        | KR020087        | 13        | 37        |
| 24        | GQ431950        | 13        | 37        | 50        | KX302503        | 13        | 37        |
| 25        | GQ432249        | 13        | 37        | 51        | FJ623491        | 13        | 37        |
| 26        | GQ432594        | 13        | 37        |           |                 |           |           |

**Table S5. List of anchoring residues in HIV-1 subtype A1 gag protein from Kenya and Pakistan.**

| A1                                | Gag 303 HXB2 Position |                                                                                     |           |
|-----------------------------------|-----------------------|-------------------------------------------------------------------------------------|-----------|
| Pakistani HIV-1 Subtype A1 Strain |                       |                                                                                     |           |
| Epitope                           | HXB2 Position         | Restricted HLA                                                                      | Anchors   |
| DYVDRFFK <u>V</u>                 | 2358-303              | B*5103, Cw*0601-0602                                                                | .....V    |
|                                   |                       | Cw*0401                                                                             | .Y.....   |
| YVDRFFK <u>V</u>                  | 2359-303              | DPA1*0102/DPB1*0201                                                                 | Y...F..V  |
| YVDRFFK <u>V</u> L                | 2359-304              | A*0205, A*0206, A*0214, A*2602-2603, A*3001, A*6802, A*6901, B*0702, B*3501, B*3503 | .V.....L  |
|                                   |                       | A*0205, A*3004, B*3801, Cw*0301, Cw*0601-0602, Cw*0702                              | .....L    |
|                                   |                       | A*0206, B*3501                                                                      | .V.....   |
| VDRFFK <u>V</u>                   | 2360-303              | DRB1*1501                                                                           | V..F..V   |
| VDRFFK <u>V</u> LRA               | 2360-306              | DPA1*0201/DPB1*0401                                                                 | V....V..A |
| VDRFFK <u>V</u> LR                | 2360-305              | A*1101, A*3101, A*3303                                                              | .....R    |
|                                   |                       | B*0801                                                                              | .R.....   |
| DRFFK <u>V</u> LRA                | 2361-306              | B*2703, B*2705, DPB1*0301                                                           | .R.....   |
|                                   |                       | DQA1*0102/DQB1*0602                                                                 | ....V..A  |
|                                   |                       | DQB1*0602                                                                           | D.FF.V..A |
| FFK <u>V</u>                      | 300-303               | DRB1*0901 or DRB4*0101                                                              | F..V      |
| FFK <u>V</u> LRAEQ                | 300-308               | B*0801                                                                              | .K.....   |
|                                   |                       | DRB1*0401                                                                           | F.....Q   |
|                                   |                       | DRB1*0401 or DRB4*0101                                                              | F..V.RA.Q |
| FFK <u>V</u> LRAEQA               | 300-309               | DPA1*0201/DPB1*0401                                                                 | F....A..A |
| FK <u>V</u> LR                    | 301-305               | DRB1*0801                                                                           | F...R     |
| FK <u>V</u> LRAEQA                | 301-309               | B*2705                                                                              | .K.....   |
|                                   |                       | DQA1*0102/DQB1*0602                                                                 | ....A..A  |
|                                   |                       | DQB1*0602                                                                           | F.VL.A..A |
|                                   |                       | DRB1*0101                                                                           | F..L.A..A |
| K <u>V</u> LRAEQAT                | 302-310               | A*0206, B*3501                                                                      | .V.....   |
| <u>V</u> LRAEQATQ                 | 303-311               | B*0801                                                                              | .R.....   |
|                                   |                       | DRB1*0401                                                                           | V.....Q   |
|                                   |                       | DRB1*0401 or DRB4*0101                                                              | V..A.QA.Q |

| A2                             | Gag 303 HXB2 Position |                                                                                     |            |
|--------------------------------|-----------------------|-------------------------------------------------------------------------------------|------------|
| Kenyan HIV-1 Subtype A1 Strain |                       |                                                                                     |            |
| Epitope                        | HXB2 Position         | Restricted HLA                                                                      | Anchors    |
| DYVDRFFK <u>T</u>              | 2358-303              | Cw*0401                                                                             | .Y.....    |
| YVDRFFK <u>T</u> L             | 2359-304              | A*0205, A*0206, A*0214, A*2602-2603, A*3001, A*6802, A*6901, B*0702, B*3501, B*3503 | .V.....L   |
|                                |                       | A*0205, A*3004, B*3801, Cw*0301, Cw*0601-0602, Cw*0702                              | .....L     |
|                                |                       | A*0206, B*3501                                                                      | .V.....    |
| VDRFFK <u>T</u> LR             | 2360-305              | A*1101, A*3101, A*3303                                                              | .....R     |
|                                |                       | B*0801                                                                              | .R.....    |
| DRFFK <u>T</u> LRA             | 2361-306              | B*2703, B*2705, DPB1*0301                                                           | .R.....    |
|                                |                       | DQA1*0102/DQB1*0602                                                                 | ....T..A   |
|                                |                       | DQB1*0602                                                                           | D.FF.T..A  |
| FFK <u>T</u>                   | 300-303               | DRB1*0301 or DRB3*0201                                                              | F..T       |
| FFK <u>T</u> LRAEQ             | 300-308               | B*0801                                                                              | ..K.....   |
|                                |                       | DRB1*0401                                                                           | F.....Q    |
| FFK <u>T</u> LRAEQA            | 300-309               | DPA1*0201/DPB1*0401                                                                 | F.....A..A |
| F <u>K</u> TLR                 | 301-305               | DRB1*0801                                                                           | F...R      |
| F <u>K</u> TLRAEQA             | 301-309               | B*2705                                                                              | .K.....    |
|                                |                       | DQA1*0102/DQB1*0602                                                                 | ....A..A   |
|                                |                       | DQB1*0602                                                                           | F.TL.A..A  |
|                                |                       | DRB1*0101                                                                           | F..L.A..A  |
| TLRAEQATQ                      | 303-311               | B*0801                                                                              | .R.....    |

| B1                                | Gag 332 HXB2 Position |                                                                                      |           |
|-----------------------------------|-----------------------|--------------------------------------------------------------------------------------|-----------|
| Pakistani HIV-1 Subtype A1 Strain |                       |                                                                                      |           |
| Epitope                           | HXB2 Position         | Restricted HLA                                                                       | Anchors   |
| NANPDCK <u>T</u> I                | 325-333               | B*3501, B*7801                                                                       | .A.....   |
|                                   |                       | B*3501, B*5101-5103                                                                  | .A.....I  |
|                                   |                       | B*3801, B*5101, B*5103, Cw*0301, Cw*0601-0602                                        | .....I    |
| ANPDCK <u>T</u> IL                | 326-334               | A*0205, A*3004, B*3801, Cw*0301, Cw*0601-0602, Cw*0702                               | .....L    |
|                                   |                       | B*0703                                                                               | .N.....L  |
|                                   |                       | Cw*0102                                                                              | ..P.....L |
| NP <u>D</u> CK <u>T</u> ILR       | 327-335               | A*1101, A*3101, A*3303                                                               | .....R    |
|                                   |                       | A*6601                                                                               | .P.....R  |
|                                   |                       | B*0703, B*0705, B*3501, B*5301, B*5401, B*5501-5502, B*5601, B*6701, B*7801, Cw*0401 | .P.....   |
| PDCK <u>T</u> ILRA                | 328-336               | DQA1*0102/DQB1*0602                                                                  | ....I..A  |
| DCK <u>T</u> IL                   | 329-334               | DQA1*0301/DQB1*0301                                                                  | D..T.L    |
| DCK <u>T</u> ILRAL                | 329-337               | A*0205, A*3004, B*3801, Cw*0301, Cw*0601-0602, Cw*0702                               | .....L    |
|                                   |                       | B*0801                                                                               | ..K.....  |
|                                   |                       | DQA1*0102/DQB1*0602                                                                  | ....L..L  |
| CK <u>T</u> IL                    | 330-334               | DQA1*0301/DQB1*0301                                                                  | ..T.L     |
| CKTILRALG                         | 330-338               | B*2705                                                                               | .K.....   |

| B2                             | Gag 332 HXB2 Position |                                                                                      |           |
|--------------------------------|-----------------------|--------------------------------------------------------------------------------------|-----------|
| Kenyan HIV-1 Subtype A1 Strain |                       |                                                                                      |           |
| Epitope                        | HXB2 Position         | Restricted HLA                                                                       | Anchors   |
| NANPDCK <u>S</u> I             | 325-333               | B*3501, B*7801                                                                       | .A.....   |
|                                |                       | B*3501, B*5101-5103                                                                  | .A.....I  |
|                                |                       | B*3801, B*5101, B*5103, Cw*0301, Cw*0601-0602                                        | .....I    |
|                                |                       | B*7801                                                                               | .A....S.  |
| ANPDCK <u>S</u> IL             | 326-334               | A*0205, A*3004, B*3801, Cw*0301, Cw*0601-0602, Cw*0702                               | .....L    |
|                                |                       | B*0703                                                                               | .N.....L  |
|                                |                       | Cw*0102                                                                              | ..P.....L |
| NPDC <u>K</u> SILR             | 327-335               | A*1101, A*3101, A*3303                                                               | .....R    |
|                                |                       | A*6601                                                                               | .P.....R  |
|                                |                       | B*0703, B*0705, B*3501, B*5301, B*5401, B*5501-5502, B*5601, B*6701, B*7801, Cw*0401 | .P.....   |
| PDCK <u>S</u> ILRA             | 328-336               | DQA1*0102/DQB1*0602                                                                  | ....L.A   |
| DCK <u>S</u> IL                | 329-334               | DQA1*0301/DQB1*0301                                                                  | D..S.L    |
| DCK <u>S</u> ILRAL             | 329-337               | A*0205, A*3004, B*3801, Cw*0301, Cw*0601-0602, Cw*0702                               | .....L    |
|                                |                       | B*0801                                                                               | ..K.....  |
|                                |                       | DQA1*0102/DQB1*0602                                                                  | ....L..L  |
| CK <u>S</u> IL                 | 330-334               | DQA1*0301/DQB1*0301                                                                  | ..S.L     |
| CKSILRALG                      | 330-338               | B*2705                                                                               | .K.....   |

| C1                                | Gag 357 HXB2 Position |                                                                                                                     |           |
|-----------------------------------|-----------------------|---------------------------------------------------------------------------------------------------------------------|-----------|
| Pakistani HIV-1 Subtype A1 Strain |                       |                                                                                                                     |           |
| Epitope                           | HXB2 Position         | Restricted HLA                                                                                                      | Anchors   |
| CQGVGGPSH                         | 350-358               | A*0206                                                                                                              | .Q.....   |
| QGVGGPSHK                         | 351-359               | A*1101                                                                                                              | .....K    |
|                                   |                       | B*7801                                                                                                              | .G.....   |
| GVGGPSHKA                         | 352-360               | A*0206, B*3501                                                                                                      | .V.....   |
|                                   |                       | DQA1*0102/DQB1*0602                                                                                                 | ....S..A  |
| VGGPSHKAR                         | 353-361               | A*1101, A*3101, A*3303                                                                                              | .....R    |
|                                   |                       | B*7801                                                                                                              | .G.....   |
|                                   |                       |                                                                                                                     | .G....A.  |
| DRB1*0401 or DRB4*0101            | V..P.HK.R             |                                                                                                                     |           |
| GGPSHKARV                         | 354-362               | B*5101-5103                                                                                                         | .G.....V  |
|                                   |                       | B*5103, Cw*0601-0602                                                                                                | .....V    |
|                                   |                       | B*7801                                                                                                              | .G.....   |
| GPSHKARVL                         | 355-363               | A*0205, A*3004, B*3801, Cw*0301, Cw*0601-0602, Cw*0702                                                              | .....L    |
|                                   |                       | B*0702-0703, B*0705, B*3501, B*3503, B*3909, B*4201, B*5101, B*5301, B*5601, B*8101, Cw*0401-0406, Cw*0603, Cw*0703 | .P.....L  |
|                                   |                       | B*0703, B*0705, B*3501, B*5401, B*5501-5502, B*5601, B*6701, B*7801, Cw*0401                                        | .P.....   |
|                                   |                       | DQA1*0102/DQB1*0602                                                                                                 | ....A..L  |
| SHKARVLAE                         | 357-365               | B*0801                                                                                                              | ..K.R.... |
|                                   |                       | B*0801                                                                                                              | ..K.....  |
|                                   |                       | DQA1*0301/DQB1*0302                                                                                                 | S.....E   |

| C2                             | Gag 357 HXB2 position |                                                                                                                     |           |
|--------------------------------|-----------------------|---------------------------------------------------------------------------------------------------------------------|-----------|
| Kenyan HIV-1 Subtype A1 Strain |                       |                                                                                                                     |           |
| Epitope                        | HXB2 Position         | Restricted HLA                                                                                                      | Anchors   |
| CQGVGGP <u>G</u> H             | 350-358               | A*0206                                                                                                              | .Q.....   |
| QGVGGP <u>G</u> HK             | 351-359               | A*1101                                                                                                              | .....K    |
|                                |                       | B*7801                                                                                                              | .G.....   |
| GVGGP <u>G</u> HKA             | 352-360               | A*0206, B*3501                                                                                                      | .V.....   |
| VGGP <u>G</u> HKAR             | 353-361               | A*1101, A*3101, A*3303                                                                                              | .....R    |
|                                |                       | B*7801                                                                                                              | .G.....   |
|                                |                       |                                                                                                                     | .G....A.  |
| GGP <u>G</u> HKARV             | 354-362               | DRB1*0401 or DRB4*0101                                                                                              | V..P.HK.R |
|                                |                       | B*5101-5103                                                                                                         | .G.....V  |
|                                |                       | B*5103, Cw*0601-0602                                                                                                | .....V    |
|                                |                       | B*7801                                                                                                              | .G.....   |
| GP <u>G</u> HKARVL             | 355-363               | A*0205, A*3004, B*3801, Cw*0301, Cw*0601-0602, Cw*0702                                                              | .....L    |
|                                |                       | B*0702-0703, B*0705, B*3501, B*3503, B*3909, B*4201, B*5101, B*5301, B*5601, B*8101, Cw*0401-0406, Cw*0603, Cw*0703 | .P.....L  |
|                                |                       | B*0703, B*0705, B*3501, B*5301, B*5501-5502, B*5601, B*6701, B*7801, Cw*0401                                        | .P.....   |
|                                |                       | DQA1*0102/DQB1*0602                                                                                                 | ....A..L  |
| P <u>G</u> HKARVLA             | 356-364               | B*7801                                                                                                              | .G.....   |
| <u>G</u> HKARVLAE              | 357-365               | B*0801                                                                                                              | ..K.R.... |
|                                |                       |                                                                                                                     | ..K.....  |



| D1                                | Gag 370, 372, 375 HXB2 Position |                                                                                                 |           |
|-----------------------------------|---------------------------------|-------------------------------------------------------------------------------------------------|-----------|
| Pakistani HIV-1 Subtype A1 Strain |                                 |                                                                                                 |           |
| Epitope                           | HXB2 Position                   | Restricted HLA                                                                                  | Anchors   |
| LAEAMSQA                          | 363-370                         | DPA1*0102/DPB1*0201                                                                             | L...M..A  |
| LAEAMSQAQ                         | 363-371                         | A*6901                                                                                          | .A.....Q  |
|                                   |                                 | B*3501, B*7801                                                                                  | .A.....   |
|                                   |                                 | B*7801                                                                                          | .A....A.  |
|                                   |                                 | DRB1*0401                                                                                       | L.....Q   |
|                                   |                                 | DRB1*0401 or DRB4*0101                                                                          | L..A.SQ.Q |
| AEAMSQAQQ                         | 364-372                         | B*18                                                                                            | .E.....   |
|                                   |                                 | B*3701                                                                                          | .E....QQ  |
| EAMSQA                            | 365-370                         | DQA1*0301/DQB1*0301                                                                             | E..S.A    |
| EAMSQAQQT                         | 365-373                         | B*3501, B*7801                                                                                  | .A.....   |
|                                   |                                 | DQA1*0102/DQB1*0602                                                                             | ....A..T  |
|                                   |                                 | DQB1*0602                                                                                       | E.MS.A..T |
| AMSQA                             | 366-370                         | DQA1*0301/DQB1*0301                                                                             | ..S.A     |
| AMSQAQQTN                         | 366-374                         | B*2703                                                                                          | .M.....   |
| MSQAQQTNM                         | 367-375                         | A*3004, B*1502, Cw*0301                                                                         | .....M    |
|                                   |                                 | B*1516                                                                                          | .S.....M  |
|                                   |                                 | DRB1*0401 or DRB4*0101                                                                          | M..A.QT.M |
| SQAQQTNMM                         | 368-376                         | A*0206                                                                                          | .Q.....   |
|                                   |                                 | A*0214, B*1502, B*3902, Cw*0704                                                                 | .Q.....M  |
|                                   |                                 | A*3004, B*1502, Cw*0301                                                                         | .....M    |
|                                   |                                 | B*5201                                                                                          | .....MM   |
| QAQQTNMMM                         | 369-377                         | A*0214, A*6901, B*1502, B*3501, B*3503, B*5101, Cw*0303-0306, Cw*0308-Cw*0309, Cw*0801-Cw*0806, | .A.....M  |
|                                   |                                 | A*3004, B*1502, Cw*0301                                                                         | .....M    |
|                                   |                                 | B*3501, B*7801                                                                                  | .A.....   |
|                                   |                                 | B*5201                                                                                          | .....MM   |
| AQQTNMMM                          | 370-378                         | A*0206                                                                                          | .Q.....   |
| QQTNMMMQR                         | 371-379                         | A*0206                                                                                          | .Q.....   |
|                                   |                                 | A*1101, A*3101, A*3303                                                                          | .....R    |
| NMMMQRGNF                         | 374-382                         | A*0301, A*3001, B*1512, B*3503, B*4402-4403, B*30901                                            | .M.....F  |
|                                   |                                 | B*1502, B*3801, B*30901, B*5101, B*5103, Cw*0301, Cw*0702                                       | .....F    |
|                                   |                                 | B*2703                                                                                          | .M.....   |

| D2                                                                                        |               | Gag 370, 372, 375 HXB2 Position                                |           |
|-------------------------------------------------------------------------------------------|---------------|----------------------------------------------------------------|-----------|
| Kenyan HIV-1 Subtype A1 Strain                                                            |               |                                                                |           |
| Epitope                                                                                   | HXB2 Position | Restricted HLA                                                 | Anchors   |
| VLA <u>E</u> AMS <u>Q</u> <u>V</u>                                                        | 362-370       | A*0201-0202, A*0214                                            | .L.....V  |
|                                                                                           |               | B*5103, Cw*0601-0602                                           | .....V    |
| L <u>A</u> EAMS <u>Q</u> <u>V</u>                                                         | 363-370       | DPA1*0102/DPB1*0201                                            | L...M..V  |
| L <u>A</u> EAMS <u>Q</u> <u>V</u> <u>Q</u>                                                | 363-371       | A*6901                                                         | .A.....Q  |
|                                                                                           |               | B*3501, B*7801                                                 | .A.....   |
|                                                                                           |               | DRB1*0401                                                      | L.....Q   |
|                                                                                           |               | DRB1*0401 or DRB4*0101                                         | L..A.SQ.Q |
| L <u>A</u> EAMS <u>Q</u> <u>V</u> <u>Q</u> <u>H</u>                                       | 363-372       | DRB1*1501 or DRB5*0101                                         | L.....H   |
| <u>A</u> EAMS <u>Q</u> <u>V</u> <u>Q</u> <u>H</u>                                         | 364-372       | B*18                                                           | .E.....   |
|                                                                                           |               | B*3701                                                         | .E....QH  |
| <u>E</u> AMS <u>Q</u> <u>V</u> <u>Q</u> <u>H</u> <u>T</u>                                 | 365-373       | B*3501, B*7801                                                 | .A.....   |
|                                                                                           |               | DQA1*0102/DQB1*0602                                            | ....V..T  |
|                                                                                           |               | DQB1*0602                                                      | E.MS.V..T |
| <u>A</u> MS <u>Q</u> <u>V</u>                                                             | 366-370       | DQA1*0301/DQB1*0301                                            | ..S.V     |
| <u>A</u> MS <u>Q</u> <u>V</u> <u>Q</u> <u>H</u> <u>T</u> <u>N</u>                         | 366-374       | B*2703                                                         | .M.....   |
| <u>M</u> S <u>Q</u> <u>V</u> <u>Q</u> <u>H</u> <u>T</u> <u>N</u> <u>I</u>                 | 367-375       | B*1516-1517                                                    | .S.....I  |
|                                                                                           |               | B*3801, B*5101, B*5103, Cw*0301, Cw*0601-0602                  | .....I    |
|                                                                                           |               | DRB1*0401 or DRB4*0101                                         | M..V.HT.I |
| <u>S</u> <u>Q</u> <u>V</u> <u>Q</u> <u>H</u> <u>T</u> <u>N</u> <u>I</u> <u>M</u>          | 368-376       | A*0206                                                         | .Q.....   |
|                                                                                           |               | A*0214, B*1502, B*3902, Cw*0704                                | .Q.....M  |
|                                                                                           |               | A*3004, B*1502, Cw*0301                                        | .....M    |
|                                                                                           |               | B*5201                                                         | .....IM   |
| <u>Q</u> <u>V</u> <u>Q</u> <u>H</u> <u>T</u> <u>N</u> <u>I</u> <u>M</u> <u>M</u>          | 369-377       | A*0206, B*3501                                                 | .V.....   |
|                                                                                           |               | A*0214, A*2602, A*2603, A*3001, A*6901, B*1502, B*3501, B*3503 | .V.....M  |
|                                                                                           |               | A*3004, B*1502, Cw*0301                                        | .....M    |
|                                                                                           |               | B*5201                                                         | .....MM   |
| <u>V</u> <u>Q</u> <u>H</u> <u>T</u>                                                       | 370-373       | DRB1*0301 or DRB3*0201                                         | V..T      |
| <u>V</u> <u>Q</u> <u>H</u> <u>T</u> <u>N</u> <u>I</u> <u>M</u> <u>M</u> <u>Q</u>          | 370-378       | A*0206                                                         | .Q.....   |
|                                                                                           |               | DRB1*0401                                                      | V.....Q   |
| <u>V</u> <u>Q</u> <u>H</u> <u>T</u> <u>N</u> <u>I</u> <u>M</u> <u>M</u> <u>Q</u> <u>R</u> | 370-379       | DRB1*1501 or DRB5*0101                                         | V.....R   |
| <u>Q</u> <u>H</u> <u>T</u> <u>N</u> <u>I</u>                                              | 371-375       | DQA1*0301/DQB1*0301                                            | ..T.I     |
| <u>Q</u> <u>H</u> <u>T</u> <u>N</u> <u>I</u> <u>M</u> <u>M</u> <u>Q</u> <u>R</u>          | 371-379       | A*1101, A*3101, A*3303                                         | .....R    |
| <u>N</u> <u>I</u> <u>M</u> <u>M</u> <u>Q</u> <u>R</u> <u>G</u> <u>N</u> <u>F</u>          | 374-382       | A*0301, A*2601-A*2603, A*3001, B*3503, B*4402-4403, B*30901    | .I.....F  |
|                                                                                           |               | B*1502, B*3801, B*30901, B*5101, B*5103, Cw*0301, Cw*0702      | .....F    |
| <u>I</u> <u>M</u> <u>M</u> <u>Q</u>                                                       | 375-378       | DRB1*0301 or DRB3*0201                                         | L..Q      |
| <u>I</u> <u>M</u> <u>M</u> <u>Q</u> <u>R</u>                                              | 375-379       | DRB1*0801                                                      | L..R      |

| E1                                | Gag 383 HXB2 Position |                                                           |          |
|-----------------------------------|-----------------------|-----------------------------------------------------------|----------|
| Pakistani HIV-1 Subtype A1 Strain |                       |                                                           |          |
| Epitope                           | HXB2 Position         | Restricted HLA                                            | Anchors  |
| <u>M</u> MMQRGNF <u>K</u>         | 375-383               | A*0301                                                    | .M.....K |
|                                   |                       | A*1101                                                    | .....K   |
|                                   |                       | B*2703                                                    | .M.....  |
|                                   |                       | DRB5*0101                                                 | M..Q...K |
| MMQRGNF <u>K</u> G                | 376-384               | B*2703                                                    | .M.....  |
| MQRGNF <u>K</u> GQ                | 377-385               | A*0206                                                    | .Q.....  |
|                                   |                       | B*0801                                                    | ..R..... |
| QRGNF <u>K</u> GQK                | 378-386               | A*1101                                                    | .....K   |
|                                   |                       | B*2703, B*2705, DPB1*0301                                 | .R.....  |
|                                   |                       | B*2705                                                    | .R.....K |
| RGNF <u>K</u> GQKR                | 379-387               | A*1101, A*3101, A*3303                                    | .....R   |
|                                   |                       | B*7801                                                    | .G.....  |
|                                   |                       |                                                           | .G....K. |
| GNF <u>K</u> GQKRI                | 380-388               | B*3801, B*5101, B*5103, Cw*0301, Cw*0601-0602             | .....I   |
| NF <u>K</u> GQKRIK                | 381-389               | A*1101                                                    | .....K   |
|                                   |                       | B*0801                                                    | ..K..... |
| F <u>K</u> GQ                     | 382-385               | DRB1*0301 or DRB3*0201                                    | F..Q     |
| F <u>K</u> GQK                    | 382-386               | DRB1*0801                                                 | F...K    |
| F <u>K</u> GQKRIK                 | 382-389               | DRB1*1101 or DRB3*0202                                    | F....R.K |
| F <u>K</u> GQKRIKC                | 382-390               | B*2705                                                    | .K.....  |
| <u>K</u> GQKRIKCF                 | 383-391               | B*1502, B*3801, B*30901, B*5101, B*5103, Cw*0301, Cw*0702 | .....F   |
|                                   |                       | B*5103, B*5801                                            | .G.....F |
|                                   |                       | B*7801                                                    | .G.....  |

| E2                                | Gag 383 HXB2 Position |                                                           |          |
|-----------------------------------|-----------------------|-----------------------------------------------------------|----------|
| Kenyan HIV-1 Subtype A1 Strain    |                       |                                                           |          |
| Epitope                           | HXB2 Position         | Restricted HLA                                            | Anchors  |
| <u>I</u> MMQRGN <u>F</u> <u>R</u> | 375-383               | A*0301                                                    | .M.....R |
|                                   |                       | A*1101, A*3101, A*3303                                    | .....R   |
|                                   |                       | B*2703                                                    | .M.....  |
| MMQRGN <u>F</u> <u>R</u> G        | 376-384               | B*2703                                                    | .M.....  |
| MQRGN <u>F</u> <u>R</u> GQ        | 377-385               | A*0206                                                    | .Q.....  |
|                                   |                       | B*0801                                                    | .R.....  |
| QRGN <u>F</u> <u>R</u> GQK        | 378-386               | A*1101                                                    | .....K   |
|                                   |                       | B*2703, B*2705, DPB1*0301                                 | .R.....  |
|                                   |                       | B*2705                                                    | .R.....K |
| RGN <u>F</u> <u>R</u> GQKR        | 379-387               | A*1101, A*3101, A*3303                                    | .....R   |
|                                   |                       | B*7801                                                    | .G.....  |
|                                   |                       |                                                           | .G....K. |
| GN <u>F</u> <u>R</u> GQKRI        | 380-388               | B*3801, B*5101, B*5103, Cw*0301, Cw*0601-0602             | .....I   |
| N <u>F</u> <u>R</u> GQKRIK        | 381-389               | A*1101                                                    | .....K   |
|                                   |                       | B*0801                                                    | .R.....  |
| <u>F</u> <u>R</u> GQ              | 382-385               | DRB1*0301 or DRB3*0201                                    | F..Q     |
| <u>F</u> <u>R</u> GQK             | 382-386               | DRB1*0801                                                 | F...K    |
| <u>F</u> <u>R</u> GQKRIK          | 382-389               | DRB1*1101 or DRB3*0202                                    | F....R.K |
| <u>F</u> <u>R</u> GQKRIKC         | 382-390               | B*2703, B*2705, DPB1*0301                                 | .R.....  |
| <u>R</u> GQKRIKCF                 | 383-391               | B*1502, B*3801, B*30901, B*5101, B*5103, Cw*0301, Cw*0702 | .....F   |
|                                   |                       | B*5103, B*5801                                            | .G.....F |
|                                   |                       | B*7801                                                    | .G.....  |

**Table S6. The list of accession numbers of the sequences of highlighted position in biophysical properties analysis.**

| Position | Accession                                                                                                                                                                                                                                                                                                                                                                                                                                                | Amino Acid | Count |
|----------|----------------------------------------------------------------------------------------------------------------------------------------------------------------------------------------------------------------------------------------------------------------------------------------------------------------------------------------------------------------------------------------------------------------------------------------------------------|------------|-------|
| 312      | KX232594, KY435520, KY435537                                                                                                                                                                                                                                                                                                                                                                                                                             | D          | 3     |
|          | AF184458, AY492759, FJ623487, FJ623491, GQ431950, GQ432635, KR781621, KT022367, KX302407, KX302503                                                                                                                                                                                                                                                                                                                                                       | D          | 10    |
| 319      | PK_JF804735-JF804737, JF804K5-JF804K8, KX232606, KX232618-KX232619, KY435515, KY435528, MH819267                                                                                                                                                                                                                                                                                                                                                         | D          | 13    |
|          | GQ431965, GQ429867                                                                                                                                                                                                                                                                                                                                                                                                                                       | D          | 2     |
| 331      | JF804694, KX232626, KY435526, MH819266, MH819269                                                                                                                                                                                                                                                                                                                                                                                                         | R          | 5     |
| 372      | JF804726, JF804735-JF804737, KX232594, KX232600, KX232620-KX232621, KY435528, KY435530-KY435532, KY435566, MH819273, MH819275                                                                                                                                                                                                                                                                                                                            | H          | 15    |
|          | AF184442, AF184458, AY492759, AY772986, DQ367290, FJ623491, GQ430209, GQ430357, GQ430393, GQ430447, GQ430479, GQ430564, GQ430825, GQ432033, GQ432183, GQ431950, GQ432307, GQ432337, KR020056, GQ432390, GQ432420, GQ432480, GQ432594, GQ432635, GQ432759, KR020074, KR020077, KR020105, KR781621, KR781626, KX234022, KX302407                                                                                                                           | H          | 33    |
| 373      | AF184435, FJ623487, GQ429867, GQ430294, GQ431023, KR020087                                                                                                                                                                                                                                                                                                                                                                                               | PNGs       | 6     |
| 383      | GU376767, GU376770, GU376772-GU376774, GU376776-GU376779, GU376781, GU376783-GU376785, GU376788-GU376792, JF804693-JF804709, JF804720-JF804726, JF804728-JF804737, JF804K0-JF804K9, KX232594-KX232595, KX232597, KX232600, KX232606-KX232607, KX232609-KX232611, KX232614, KX232618-KX232621, KX232624, KX232626, KY435514-KY435538, KY435541, KY435543, KY435564, KY435566, MH819263, MH819265-MH819267, MH819269, MH819272-MH819276, MH819279-MH819283 | K          | 122   |
|          | AF184435, AF184440, AF184442, AF184453, AF184458, AF184462, AF457089, AF539405, AY492766, AY772986, DQ367289-DQ367290, FJ623487, FJ623491, GQ429867, GQ430035, GQ430209, GQ430294, GQ430357, GQ430447, GQ431023, GQ431950, GQ431965, GQ432033, GQ432183, GQ432249, GQ432390, GQ432420, GQ432480, GQ432635, GQ432759, KR020056, KR020074, KR020077, KR020087, KR020105, KR781621, KR781626, KT022367, KX234022, KX302407, KX302503, L11768                | R          | 43    |
| 402      | GU376792, JF804695, JF804703, JF804734, KX232594, KX232597, KX232609, KX232614, KY435519, KY435522, KY435525, KY435528-KY435529, KY435542, KY435566, MH819265-MH819266, MH819272, MH819274, MH819282-MH819283                                                                                                                                                                                                                                            | K          | 21    |
|          | AY492766, KR020087                                                                                                                                                                                                                                                                                                                                                                                                                                       | K          | 2     |

**Figure S1. Genotyping of HIV-1 subtype A1.**

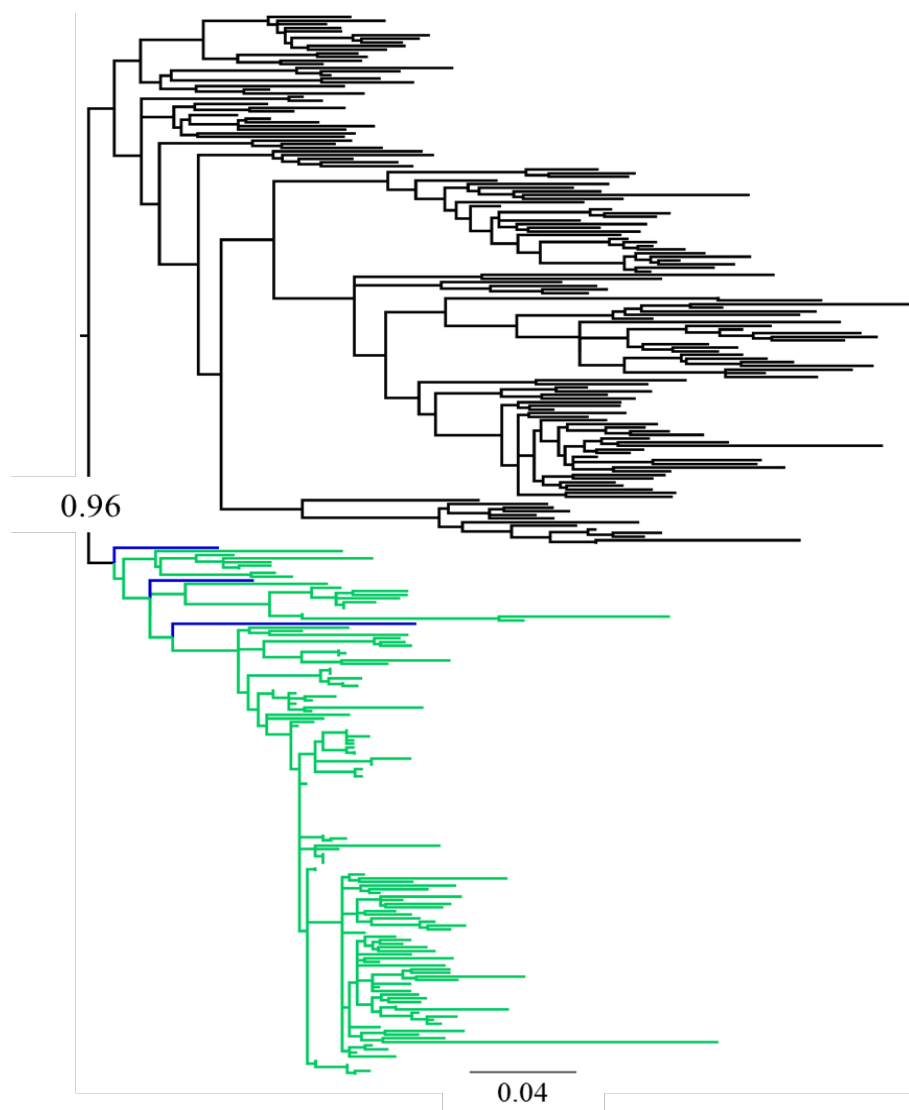

**Figure S2. Clustering pattern of Kenyan reference dataset sequence with the all available Kenyan sequences from the Los Alamos HIV Database.**

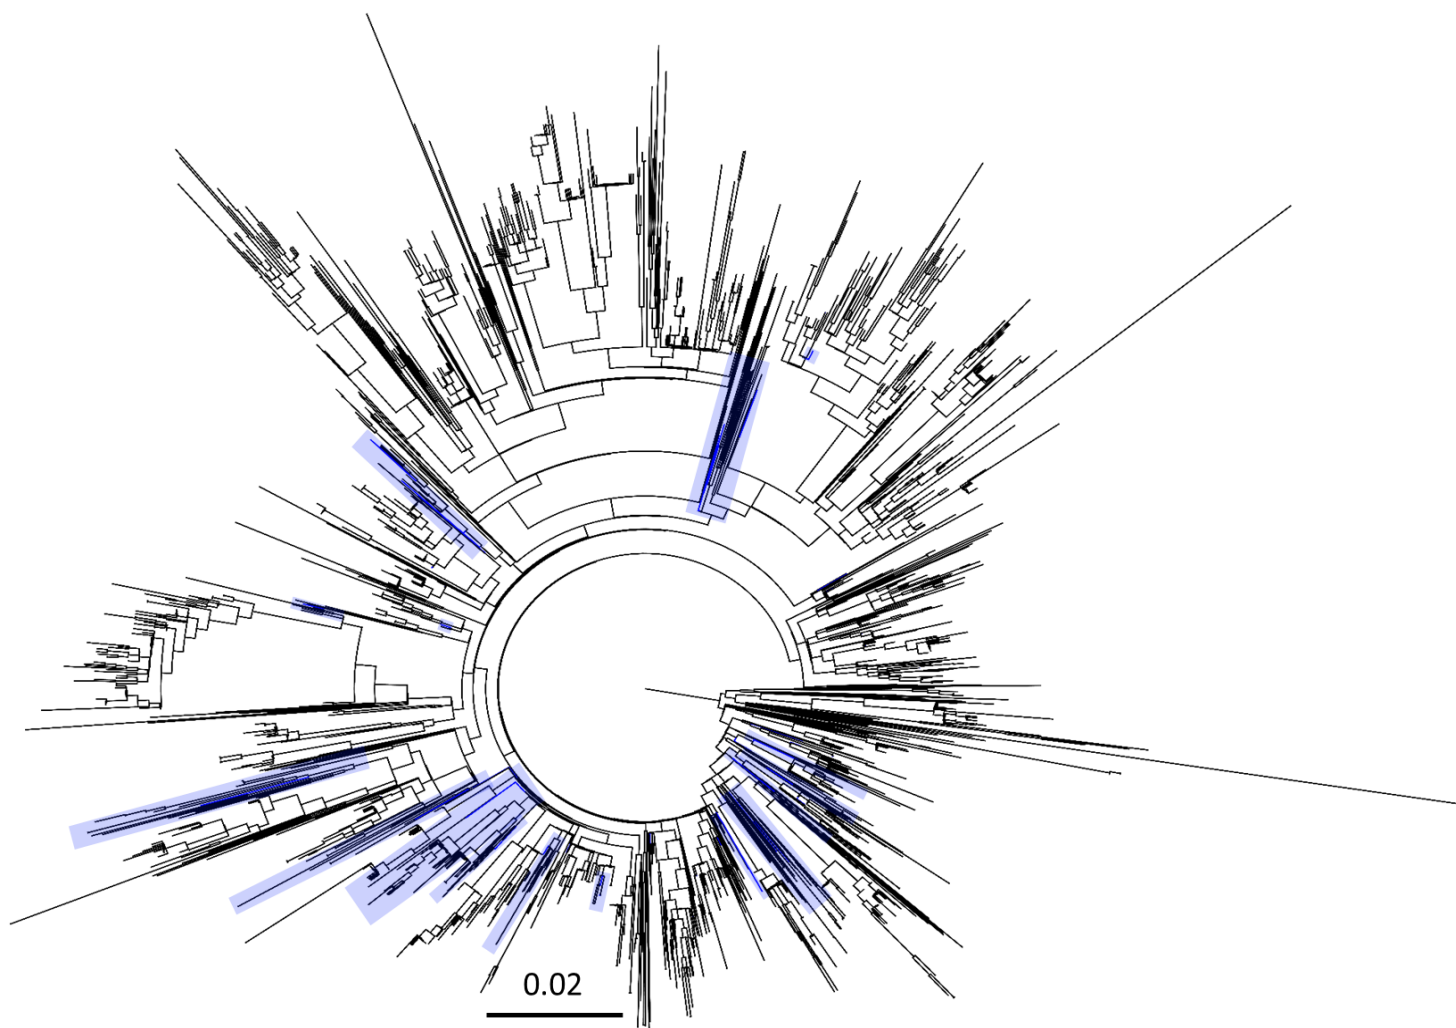

Figure S3. Amino Acid Variations within Pakistani and Kenyan cohort.

A.

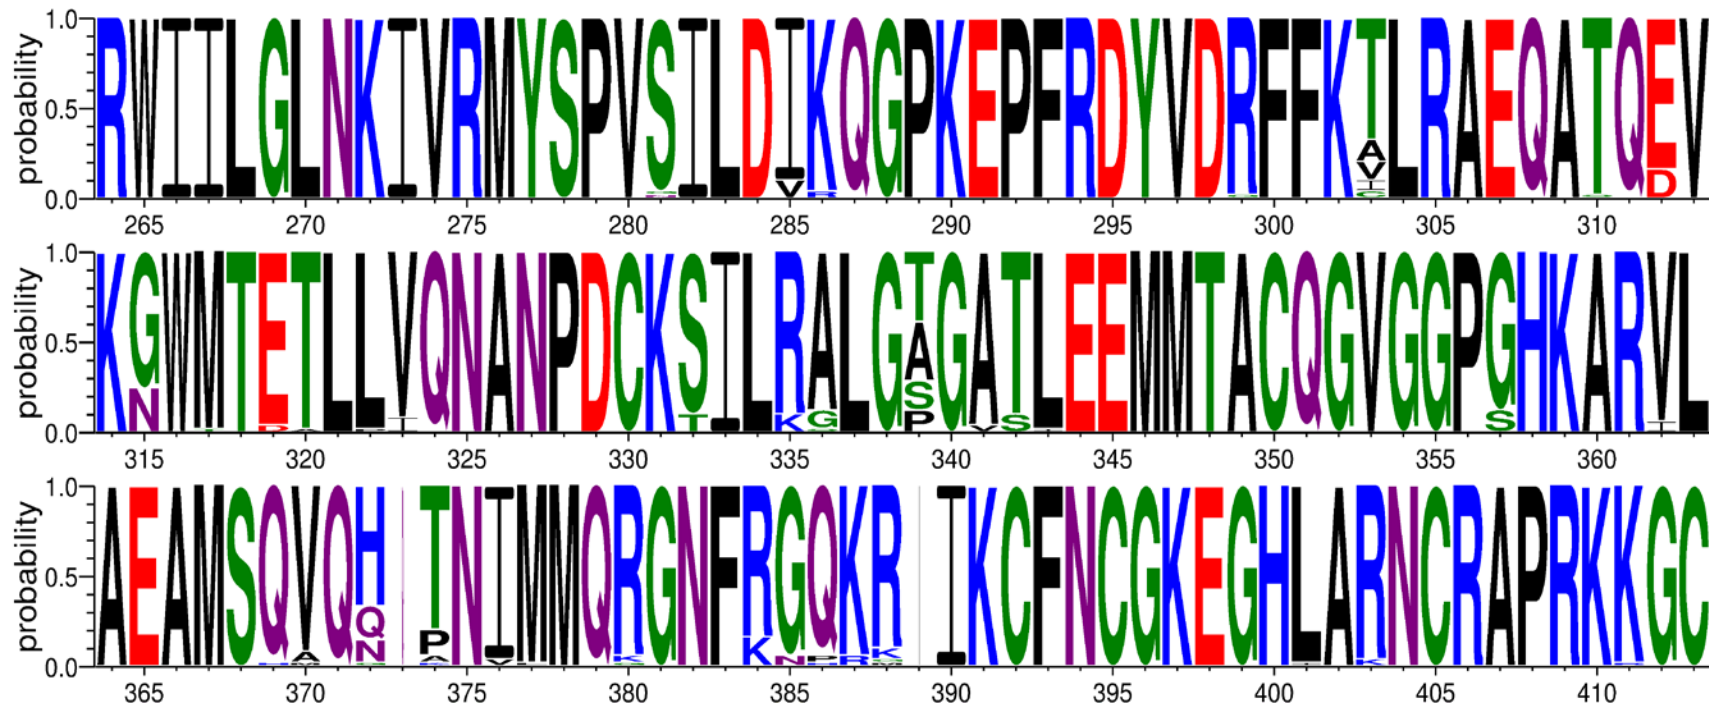



B.

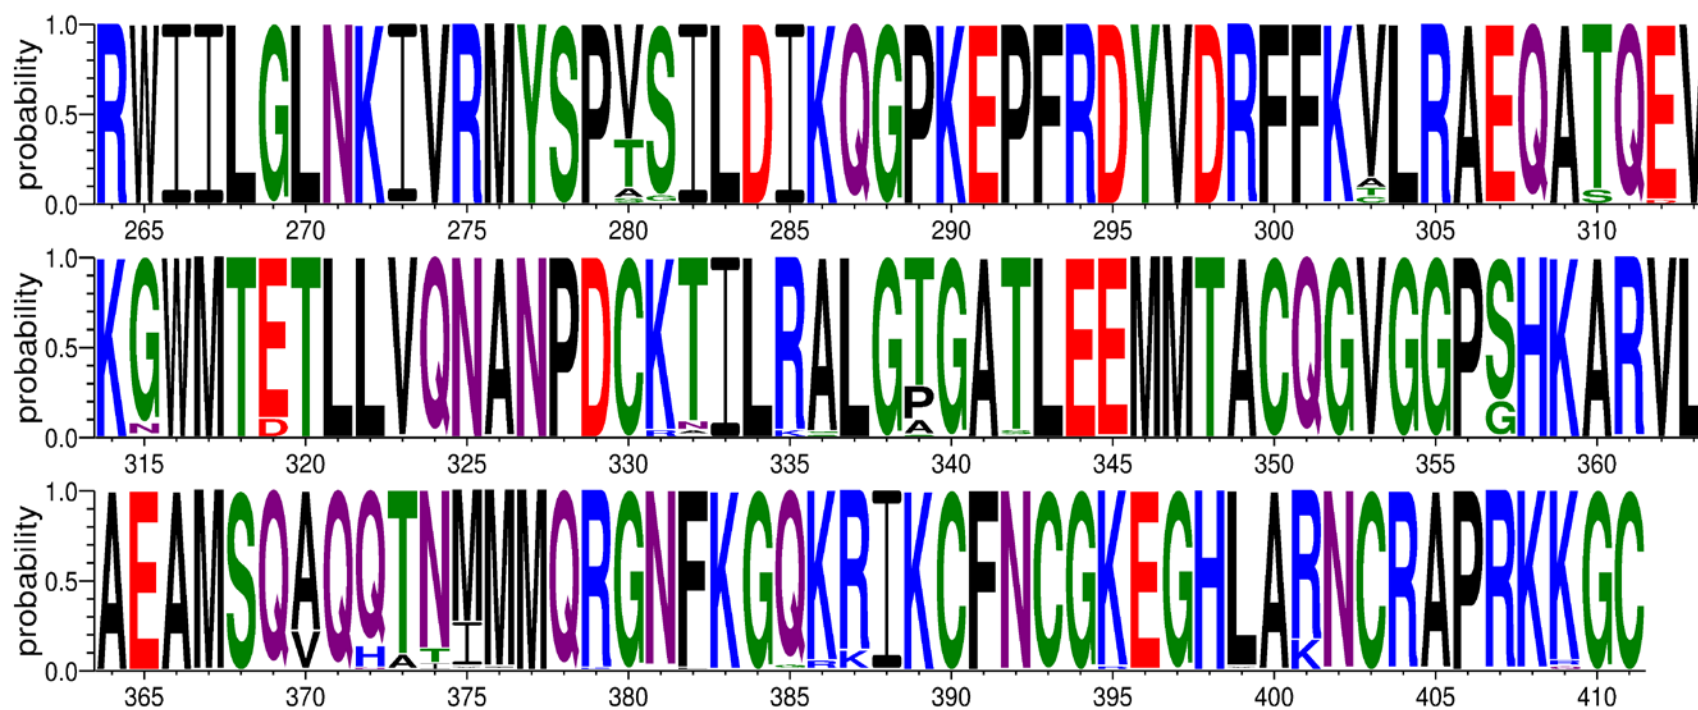

**Figure S4. Sites under selection pressure in HIV-1 subtype A1 Gag protein from Kenya and Pakistan.**

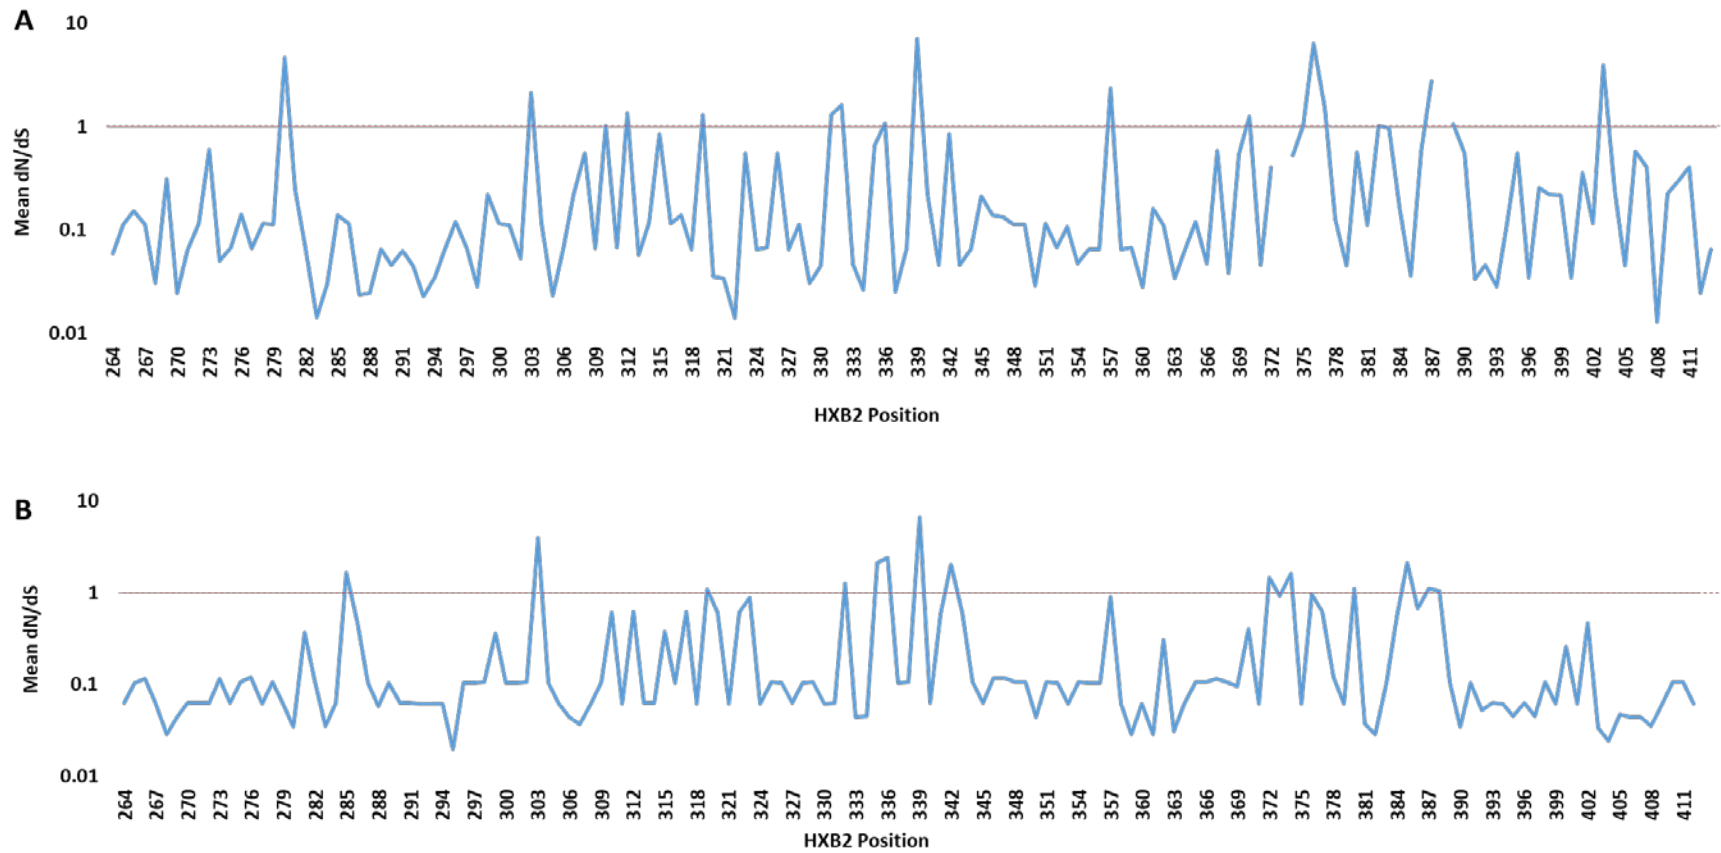

Supplement: s1 [file s1]
